## Correction: 5-Fluorouracil-induced RNA stress engages a TRAIL-DISC-dependent apoptosis axis facilitated by p53

Birce Akpinar, Ethiene V. Bracht, Dorin Reijnders, Barbora Safarikova, Iva Jelinkova, Alf Grandien, Alena Hyrslova Vaculova, Boris Zhivotovsky and Magnus Olsson

Present: Due to a technical error during image processing, the same picture set of control cells were used in TEM figures for both HCT116 wt and p53<sup>-/-</sup> cells. Figure 2B and Supplementary Figure 2 were affected.

Corrected: Correct Figure 2B and Supplementary Figure 2 are provided below. Authors sincerely apologize for this oversight.

Original article: Oncotarget. 2015; 6(41): 43679-97. doi: 10.18632/oncotarget.6030.

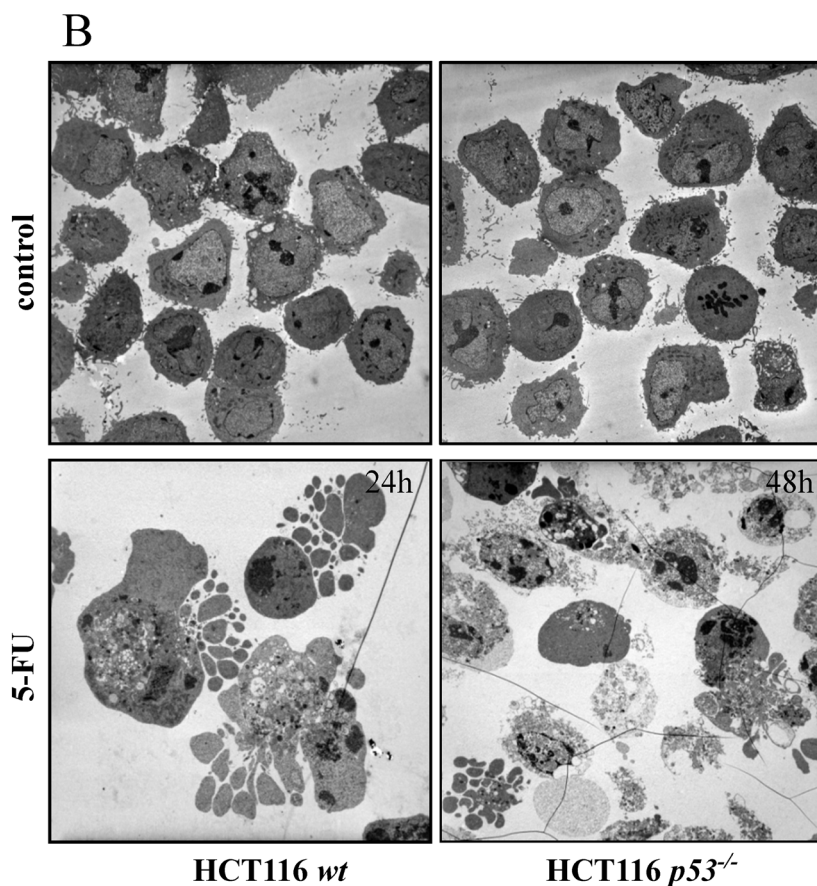

**Figure 2B:** Analysis of LDH-release from HCT116 p53<sup>-/-</sup> cells at 24, 48 and 72 h post-5-FU treatment (768 μM), either in the presence or absence of the pan-caspase inhibitor zVAD-fmk (10 μM).

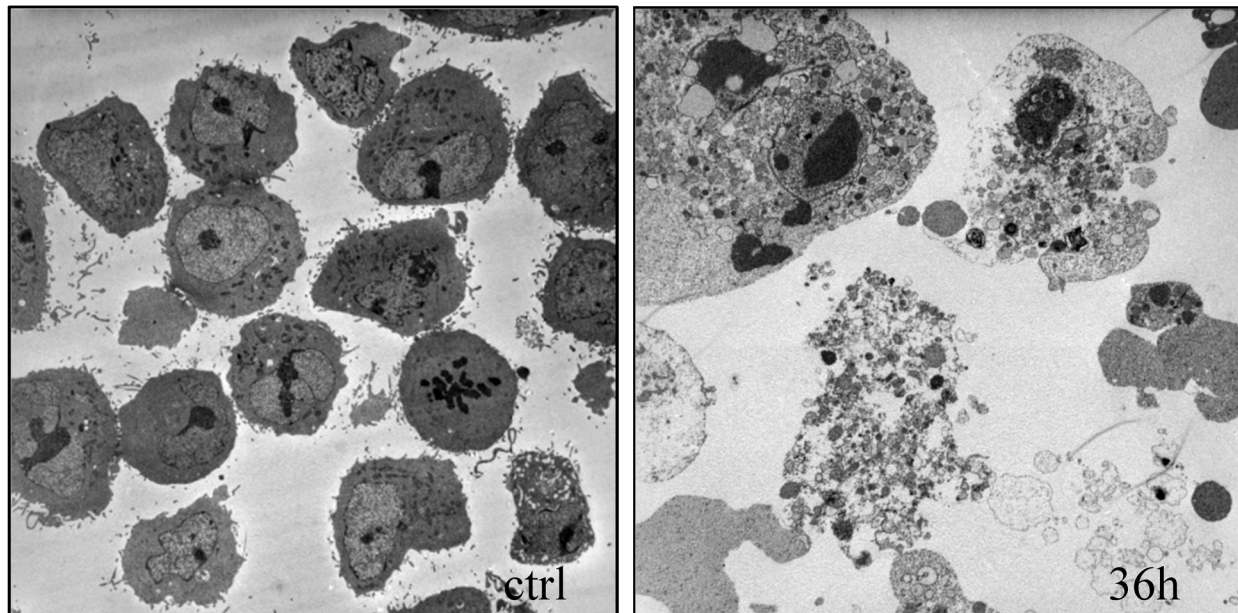

**Supplementary Figure S2: Mitochondrial release of cytochrome c but not AIF in 5-FU-treated HCT116 wt and p53<sup>-/-</sup> cells.** HCT116 *wt* and p53<sup>-/-</sup> cells, treated for 24 or 48 h were, along with non-treated controls, fractionated into cytoplasmic and mitochondrial/nuclear protein pools. Samples were separated by SDS-PAGE and cytoplasmic presence of either AIF or cytochrome *c* analyzed by immunoblotting. GAPDH served both as a marker for equal sample loading and as an indicator of fractionation efficacy.
